# Supplementary material for: In Vitro Propagation Method for Production of Phenolic-Rich Planting Material of Culinary Rhubarb ‘Malinowy’
Source: MDPI journal article supplement (doi:10.3390/plants10091768), 2021-08-25
Supplement: s1 [file s1]

## Supplementary materials

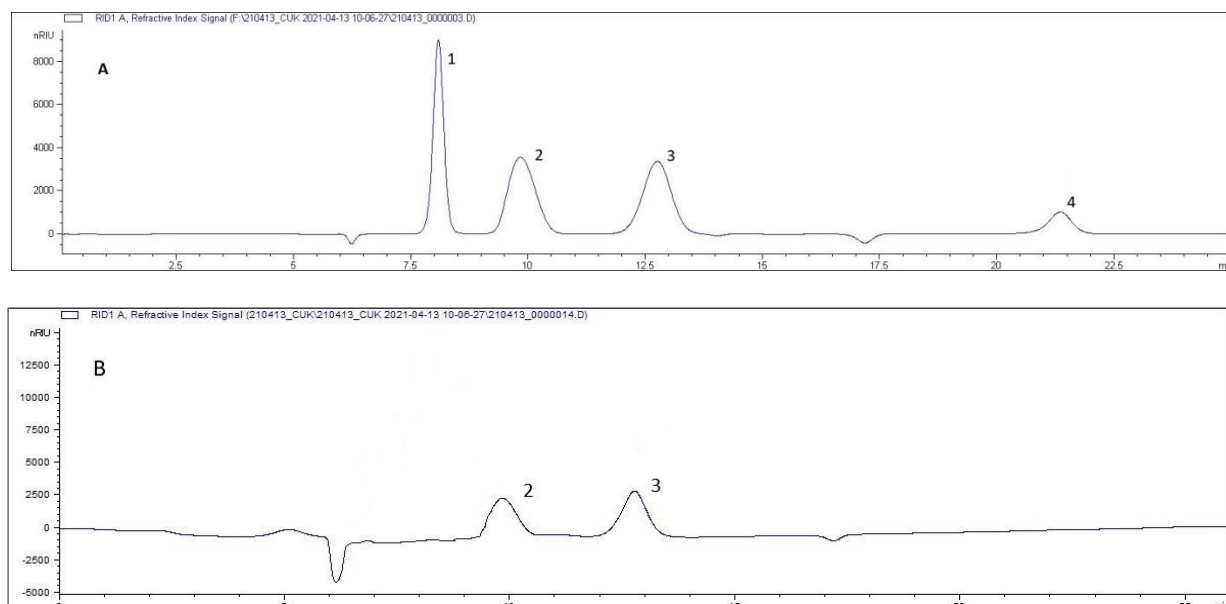

**Figure S1.** HPLC chromatograms of: (A) sugars in standard solution; (B) sugars in rhubarb 'Malinowy'. Peak identification: 1—sucrose (Rt ~8,1 min.), 2—glucose (Rt ~9,8 min), 3—fructose (Rt ~12,7 min), 4—sorbitol (Rt ~21,4 min.).

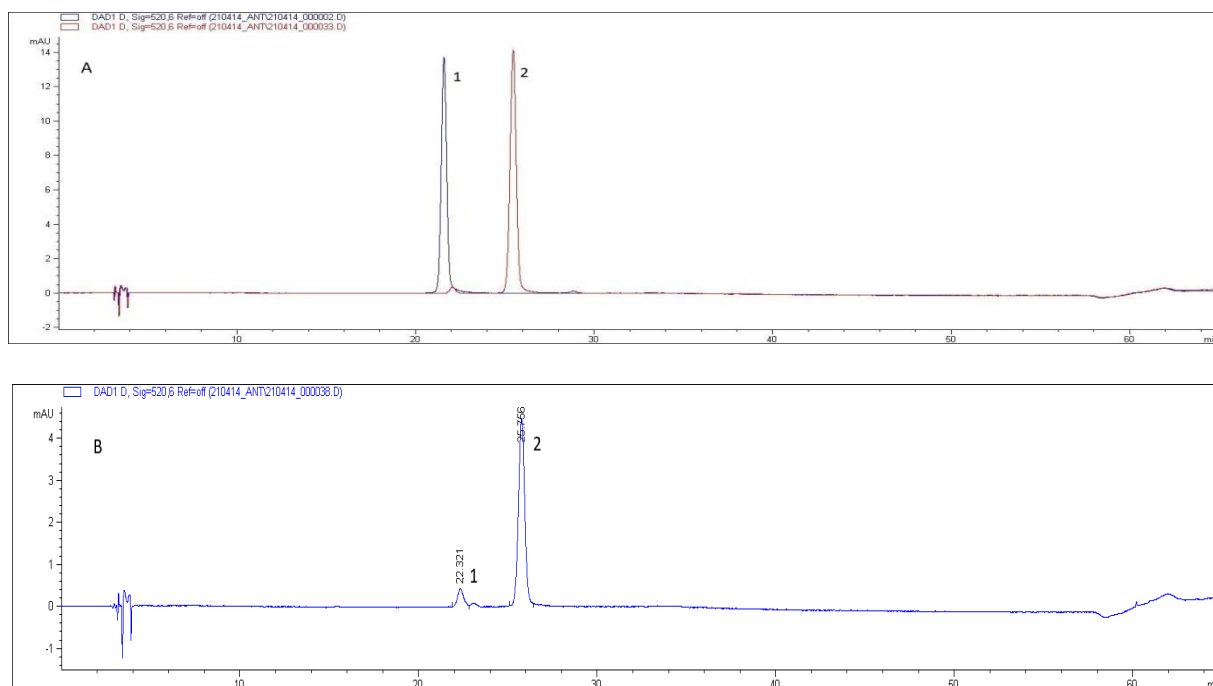

**Figure S2.** HPLC chromatograms of: (A) cyanidins in standard solution; (B) cyanidin in rhubarb 'Malinowy'. Peak identification: 1—cyanidin-3-O-glucoside (Rt ~22,3 min.), 2—cyanidin-3-O-rutinoside (Rt ~25,7 min); Rt—retention time.
